# Supplementary material for: A QM/MM MD insight into photodynamics of hypoxanthine: distinct nonadiabatic decay behaviors between keto-N7H and keto-N9H tautomers in aqueous solution
Source: Royal Society of Chemistry journal article supplement (doi:10.1039/c4cp01928h), 2014-01-01

## Electronic Supplementary Information

# QM/MM MD insight into photodynamics of hypoxanthine: distinct nonadiabatic decay behaviors between keto-N7H and keto-N9H tautomers in aqueous solution

Xugeng Guo, Yuan Zhao, and Zexing Cao\*

State Key Laboratory for Physical Chemistry of Solid Surfaces and Fujian Provincial Key Lab of Theoretical and Computational Chemistry, College of Chemistry and Chemical Engineering, Xiamen University, Xiamen 361005, P.R. China

\*E-mail: zxcao@xmu.edu.cn (Z.C.)

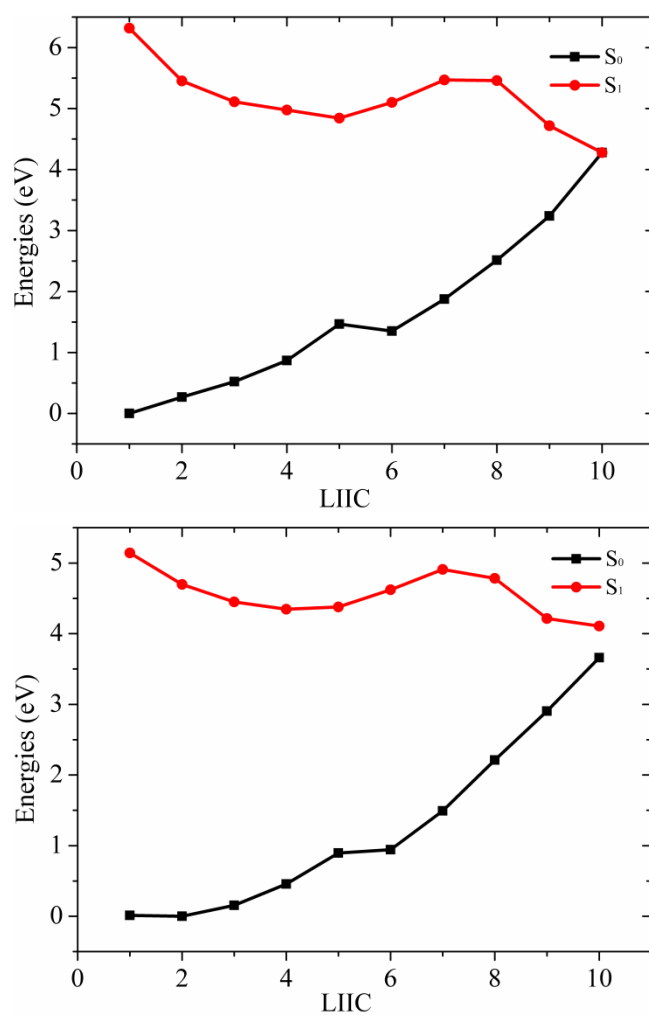

**Fig. S1** Relative energy profiles along the LIIC reaction path from the  $S_0$  state to conical intersection between  $S_0$  and  $S_1$  states of keto-N9H in the gas phase at both CASSCF (top) and CASPT2 (bottom) levels of theory, respectively.

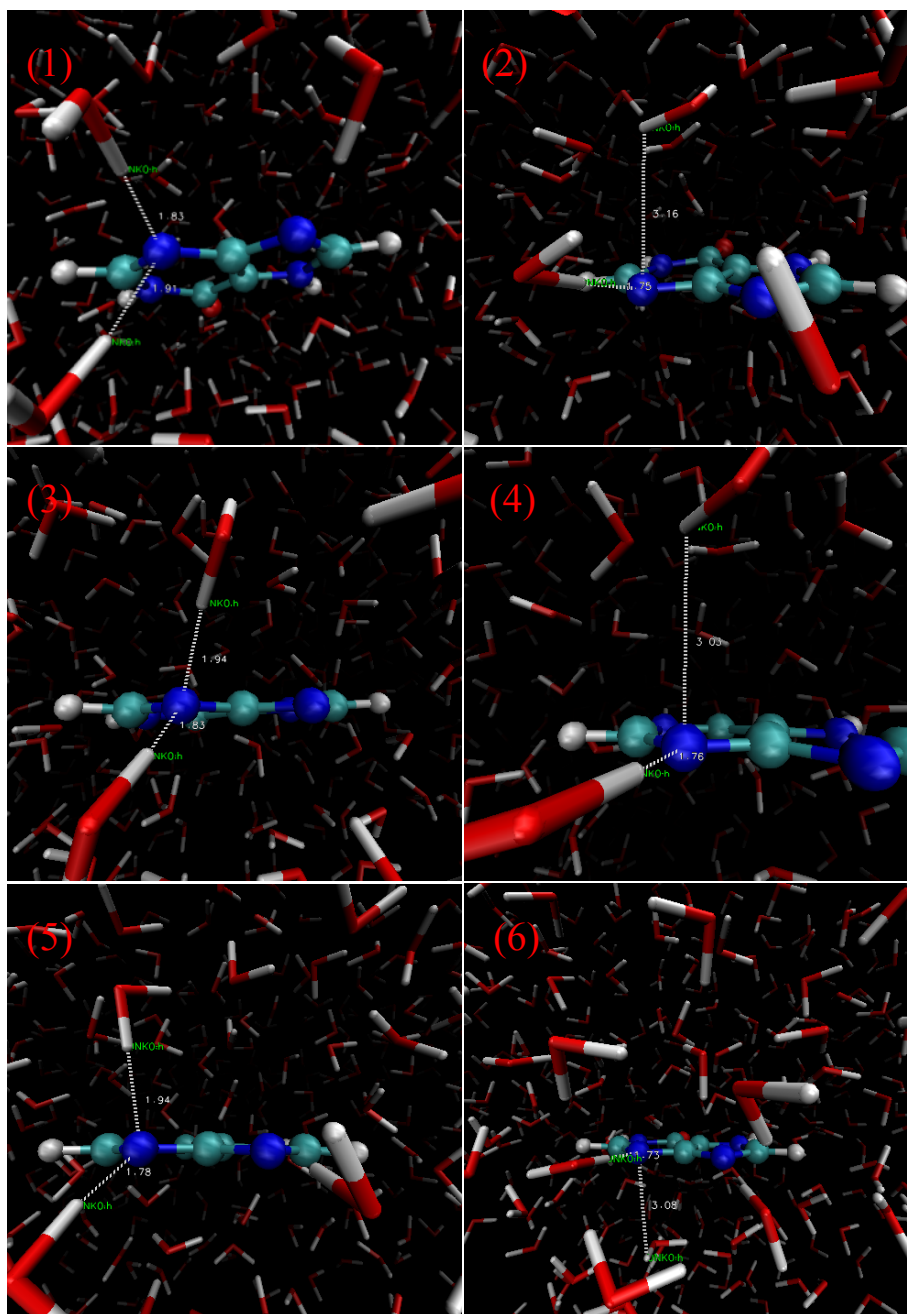

**Fig. S2** QM/MM optimized 6 snapshot geometries of hypoxanthine keto-N7H tautomer in aqueous solution. At the N<sub>3</sub> site, each structure exhibits two intermolecular H-bonds including a  $\pi$ -electron H-bond.

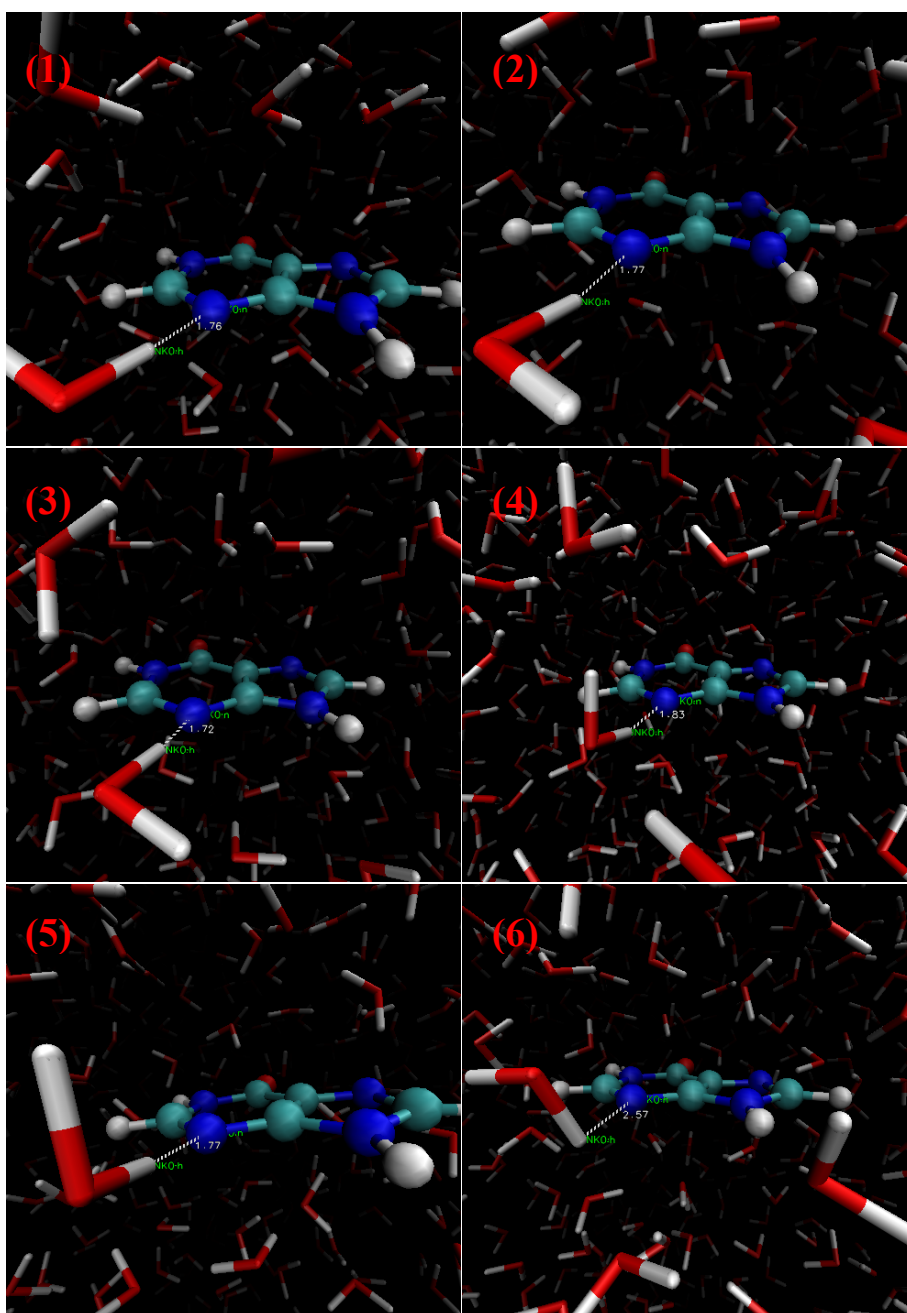

**Fig. S3** QM/MM optimized 6 snapshot geometries of hypoxanthine keto-N9H tautomer in aqueous solution. At the N<sub>3</sub> site, each structure exhibits one intermolecular H-bond.

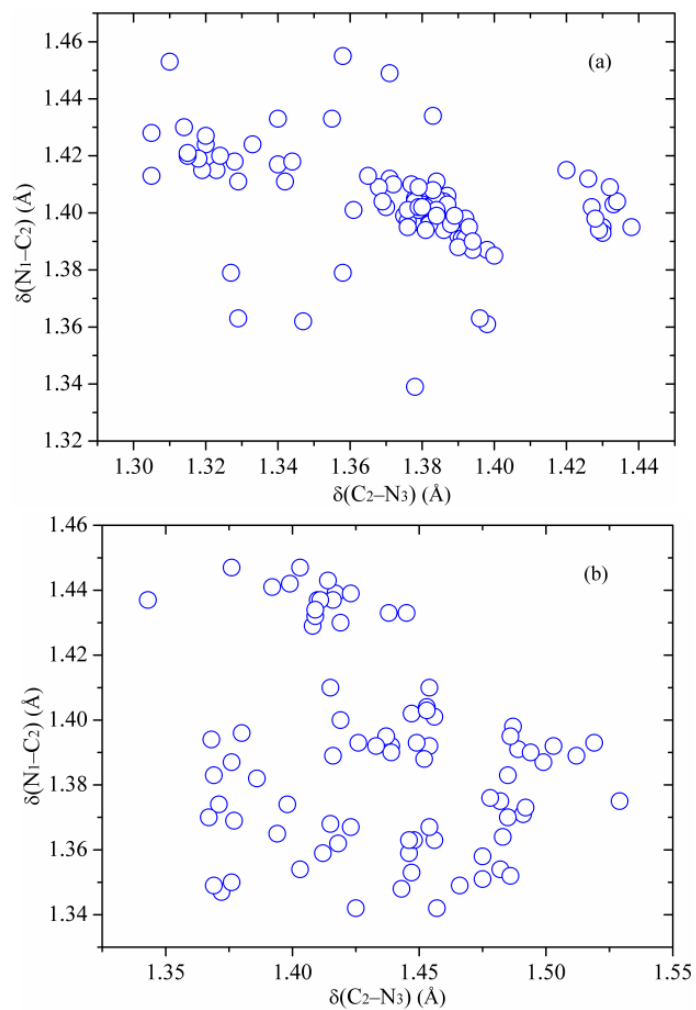

**Fig. S4** Distributions of the  $\delta(\text{C}_2\text{-N}_3)$  and  $\delta(\text{N}_1\text{-C}_2)$  bond lengths of keto-N7H (a) and keto-N9H (b) at the  $S_1 \rightarrow S_0$  hopping points.

**Table S1** Key bond lengths (in angstroms), bond angles and dihedral angles (in degrees) in the optimized structures of keto-N7H and keto-N9H tautomers

|                                                                | Vacuum <sup>a</sup> |          | Water <sup>b</sup> |          | Expt. <sup>c</sup> |
|----------------------------------------------------------------|---------------------|----------|--------------------|----------|--------------------|
|                                                                | keto-N7H            | keto-N9H | keto-N7H           | keto-N9H |                    |
| N <sub>1</sub> -C <sub>2</sub>                                 | 1.377               | 1.365    | 1.362/1.355        | 1.358    | 1.367(2)           |
| N <sub>1</sub> -C <sub>6</sub>                                 | 1.417               | 1.437    | 1.405/1.408        | 1.404    | 1.387(9)           |
| C <sub>2</sub> -N <sub>3</sub>                                 | 1.293               | 1.300    | 1.306/1.307        | 1.307    | 1.298(7)           |
| N <sub>3</sub> -C <sub>4</sub>                                 | 1.369               | 1.358    | 1.370/1.373        | 1.354    | 1.355(4)           |
| C <sub>4</sub> -C <sub>5</sub>                                 | 1.401               | 1.400    | 1.399/1.400        | 1.400    | 1.385(3)           |
| C <sub>4</sub> -N <sub>9</sub>                                 | 1.369               | 1.371    | 1.365/1.366        | 1.366    | 1.361(4)           |
| C <sub>5</sub> -C <sub>6</sub>                                 | 1.439               | 1.452    | 1.431/1.435        | 1.440    | 1.410(10)          |
| C <sub>5</sub> -N <sub>7</sub>                                 | 1.373               | 1.373    | 1.369/1.369        | 1.373    | 1.376(1)           |
| C <sub>6</sub> -O <sub>6</sub>                                 | 1.219               | 1.211    | 1.227/1.223        | 1.231    | 1.247(1)           |
| N <sub>7</sub> -C <sub>8</sub>                                 | 1.368               | 1.308    | 1.354/1.355        | 1.314    | 1.316(5)           |
| C <sub>8</sub> -N <sub>9</sub>                                 | 1.315               | 1.380    | 1.324/1.327        | 1.369    | 1.362(14)          |
| N <sub>1</sub> -C <sub>2</sub> -N <sub>3</sub>                 | 125.2               | 124.5    | 124.8/124.7        | 124.6    | 125.2(4)           |
| N <sub>1</sub> -C <sub>6</sub> -C <sub>5</sub>                 | 108.1               | 108.7    | 109.2/108.8        | 110.0    | 111.7(2)           |
| N <sub>1</sub> -C <sub>6</sub> -O <sub>6</sub>                 | 122.4               | 120.2    | 121.9/121.0        | 121.4    | 120.7(4)           |
| C <sub>2</sub> -N <sub>1</sub> -C <sub>6</sub>                 | 125.5               | 126.6    | 125.5/126.2        | 126.0    | 124.5(5)           |
| C <sub>2</sub> -N <sub>3</sub> -C <sub>4</sub>                 | 114.4               | 112.6    | 114.3/114.1        | 113.0    | 112.1(1)           |
| N <sub>3</sub> -C <sub>4</sub> -C <sub>5</sub>                 | 123.5               | 128.5    | 123.6/123.7        | 126.9    | 127.5(3)           |
| N <sub>3</sub> -C <sub>4</sub> -N <sub>9</sub>                 | 126.3               | 126.6    | 126.3/126.2        | 127.8    | 127.0(1)           |
| C <sub>4</sub> -C <sub>5</sub> -C <sub>6</sub>                 | 123.3               | 119.1    | 122.5/122.4        | 119.5    | 119.2(3)           |
| C <sub>4</sub> -C <sub>5</sub> -N <sub>7</sub>                 | 105.5               | 110.7    | 105.6/105.6        | 110.2    | 110.5(3)           |
| C <sub>4</sub> -N <sub>9</sub> -C <sub>8</sub>                 | 104.9               | 106.6    | 104.7/104.7        | 106.8    | 106.8(2)           |
| C <sub>5</sub> -N <sub>7</sub> -C <sub>8</sub>                 | 106.1               | 104.9    | 106.4/106.6        | 105.0    | 104.3(6)           |
| C <sub>5</sub> -C <sub>6</sub> -O <sub>6</sub>                 | 129.5               | 131.1    | 128.9/130.1        | 128.7    | 127.7(3)           |
| C <sub>6</sub> -C <sub>5</sub> -N <sub>7</sub>                 | 131.2               | 130.2    | 131.9/132.0        | 130.3    | 130.4(2)           |
| N <sub>7</sub> -C <sub>8</sub> -N <sub>9</sub>                 | 113.3               | 112.9    | 113.2/113.1        | 112.7    | 112.9(4)           |
| C <sub>5</sub> -N <sub>7</sub> -C <sub>8</sub> -N <sub>9</sub> | 0.0                 | 0.0      | 0.2/-0.7           | 0.2      | -                  |
| C <sub>6</sub> -C <sub>5</sub> -C <sub>4</sub> -N <sub>9</sub> | 180.0               | 180.0    | 178.0/178.3        | 177.9    | -                  |
| H···N <sub>3</sub> -C <sub>4</sub> -C <sub>5</sub>             | -                   | -        | 111.4/-111.6       | -        | -                  |
| H···N <sub>3</sub> -C <sub>4</sub> -C <sub>5</sub>             | -                   | -        | -165.8/151.3       | -163.9   | -                  |

<sup>a</sup> B3LYP/def-SVP; <sup>b</sup> QM(B3LYP/def-SVP)/MM(TIP3P); <sup>c</sup> Experimental crystal data from ref. 11.

**Table S2** Cartesian coordinates (Å) of the QMMM-optimized one representative ground-state geometry of keto-N7H. Only eight key water molecules are shown

| Atom | X         | Y         | Z         |
|------|-----------|-----------|-----------|
| C    | 0.048000  | 0.666000  | 1.630000  |
| C    | 1.628000  | 0.572000  | 0.130000  |
| C    | 1.762000  | -0.462000 | 1.063000  |
| C    | 3.610000  | -1.230000 | 0.040000  |
| C    | 2.561000  | 0.770000  | -0.937000 |
| N    | 0.763000  | -0.389000 | 1.990000  |
| N    | 0.525000  | 1.281000  | 0.522000  |
| N    | 2.781000  | -1.377000 | 1.038000  |
| N    | 3.519000  | -0.258000 | -0.910000 |
| O    | 2.593000  | 1.665000  | -1.775000 |
| H    | -0.845000 | 1.025000  | 2.130000  |
| H    | 0.185000  | 2.151000  | 0.099000  |
| H    | 4.458000  | -1.912000 | -0.062000 |
| H    | 4.207000  | -0.220000 | -1.672000 |
| O    | 2.489000  | -3.669000 | 2.649000  |
| H    | 2.887000  | -3.342000 | 3.477000  |
| H    | 2.568000  | -2.871000 | 2.081000  |
| O    | 0.255000  | 3.837000  | -0.654000 |
| H    | 1.206000  | 4.013000  | -0.423000 |
| H    | -0.153000 | 4.625000  | -0.242000 |
| O    | 4.761000  | -1.271000 | 3.132000  |
| H    | 4.035000  | -1.238000 | 2.475000  |
| H    | 4.382000  | -1.915000 | 3.773000  |

|   |           |           |           |
|---|-----------|-----------|-----------|
| O | 4.790000  | 3.229000  | -1.017000 |
| H | 5.632000  | 3.144000  | -1.524000 |
| H | 4.237000  | 2.582000  | -1.494000 |
| O | 4.944000  | 0.160000  | -3.392000 |
| H | 5.727000  | -0.182000 | -2.905000 |
| H | 5.408000  | 0.693000  | -4.085000 |
| O | -0.101000 | -2.278000 | 3.796000  |
| H | 0.311000  | -1.538000 | 3.270000  |
| H | -0.507000 | -2.766000 | 3.033000  |
| O | 3.353000  | 3.293000  | -3.832000 |
| H | 3.081000  | 2.551000  | -3.248000 |
| H | 2.485000  | 3.746000  | -3.942000 |
| O | 3.750000  | -2.865000 | 5.040000  |
| H | 3.167000  | -2.477000 | 5.749000  |
| H | 4.586000  | -2.920000 | 5.578000  |

**Table S3** Cartesian coordinates (Å) of the QMMM-optimized another representative ground-state geometry of keto-N7H. Only seven key water molecules are shown

| Atom | X        | Y        | Z         |
|------|----------|----------|-----------|
| C    | 0.237000 | 1.079000 | 0.956000  |
| C    | 2.283000 | 1.594000 | 0.394000  |
| C    | 2.231000 | 0.325000 | 0.984000  |
| C    | 4.462000 | 0.084000 | 0.821000  |
| C    | 3.515000 | 2.193000 | -0.032000 |
| N    | 0.991000 | 2.048000 | 0.384000  |
| N    | 0.944000 | 0.019000 | 1.325000  |



|   |           |           |           |
|---|-----------|-----------|-----------|
| N | 3.334000  | -0.469000 | 1.182000  |
| N | 4.575000  | 1.316000  | 0.269000  |
| O | 3.724000  | 3.279000  | -0.555000 |
| H | -0.835000 | 1.194000  | 1.103000  |
| H | 0.673000  | 2.956000  | 0.020000  |
| H | 5.403000  | -0.460000 | 0.952000  |
| H | 5.511000  | 1.698000  | 0.082000  |
| O | 3.564000  | -2.124000 | 3.371000  |
| H | 3.044000  | -1.505000 | 3.947000  |
| H | 3.434000  | -1.647000 | 2.508000  |
| O | 2.989000  | -2.466000 | -0.881000 |
| H | 2.440000  | -1.877000 | -1.457000 |
| H | 3.004000  | -1.918000 | -0.066000 |
| O | -0.171000 | -1.962000 | 2.889000  |
| H | 0.122000  | -2.800000 | 2.450000  |
| H | 0.221000  | -1.313000 | 2.247000  |
| O | 0.660000  | 4.792000  | -0.300000 |
| H | 0.471000  | 5.207000  | -1.175000 |
| H | -0.080000 | 5.190000  | 0.221000  |
| O | 7.109000  | 2.504000  | 0.214000  |
| H | 7.547000  | 2.248000  | 1.060000  |
| H | 7.772000  | 2.161000  | -0.426000 |
| O | 2.604000  | 4.120000  | -2.863000 |
| H | 2.171000  | 3.231000  | -2.887000 |
| H | 2.983000  | 4.075000  | -1.953000 |

|   |          |           |           |
|---|----------|-----------|-----------|
| O | 6.015000 | -2.974000 | 2.045000  |
| H | 6.756000 | -2.378000 | 2.315000  |
| H | 5.316000 | -2.670000 | 2.655000  |
| O | 5.285000 | -3.888000 | -0.438000 |
| H | 5.516000 | -3.574000 | 0.468000  |
| H | 4.448000 | -3.385000 | -0.575000 |

**Table S4** Cartesian coordinates (Å) of the QMMM-optimized representative ground-state geometry of keto-N9H. Only seven key water molecules are shown

| Atom | X         | Y         | Z         |
|------|-----------|-----------|-----------|
| C    | 0.051000  | -4.052000 | -2.485000 |
| C    | -1.909000 | -4.204000 | -3.310000 |
| C    | -1.719000 | -2.854000 | -2.992000 |
| C    | -3.736000 | -2.244000 | -3.687000 |
| C    | -3.171000 | -4.633000 | -3.854000 |
| N    | -0.461000 | -2.782000 | -2.464000 |
| N    | -0.791000 | -4.930000 | -2.983000 |
| N    | -2.607000 | -1.846000 | -3.162000 |
| N    | -4.015000 | -3.526000 | -4.037000 |
| O    | -3.543000 | -5.774000 | -4.126000 |
| H    | -0.022000 | -1.950000 | -2.051000 |
| H    | 1.059000  | -4.269000 | -2.132000 |
| H    | -4.544000 | -1.529000 | -3.852000 |

|   |           |           |           |
|---|-----------|-----------|-----------|
| H | -4.947000 | -3.688000 | -4.443000 |
| O | -2.445000 | 0.889000  | -3.166000 |
| H | -3.236000 | 0.989000  | -3.739000 |
| H | -2.389000 | -0.104000 | -3.163000 |
| O | -6.304000 | -2.888000 | -5.562000 |
| H | -7.094000 | -2.316000 | -5.437000 |
| H | -6.706000 | -3.602000 | -6.118000 |
| O | -3.683000 | -7.839000 | -5.863000 |
| H | -3.729000 | -7.024000 | -5.307000 |
| H | -2.945000 | -7.608000 | -6.450000 |
| O | 0.031000  | -7.219000 | -4.181000 |
| H | -0.342000 | -6.342000 | -3.893000 |
| H | 0.990000  | -7.001000 | -4.054000 |
| O | -5.206000 | -7.151000 | -2.316000 |
| H | -4.697000 | -7.769000 | -1.745000 |
| H | -4.468000 | -6.680000 | -2.759000 |
| O | 0.584000  | -0.643000 | -0.937000 |
| H | 0.852000  | -0.819000 | 0.002000  |
| H | 1.394000  | -0.152000 | -1.227000 |
| O | -1.698000 | 0.771000  | -0.534000 |
| H | -0.944000 | 0.152000  | -0.686000 |
| H | -2.050000 | 0.817000  | -1.457000 |

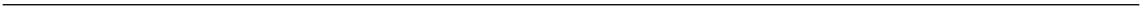

Supplement: c4cp01928h1.pdf [file c4cp01928h1.pdf]
